# Supplementary material for: FTH1 indicates poor prognosis and promotes metastasis in head and neck squamous cell carcinoma
Source: PeerJ journal article supplement (doi:10.7717/peerj.16493), 2023-11-17

WB original data for Figure 2C

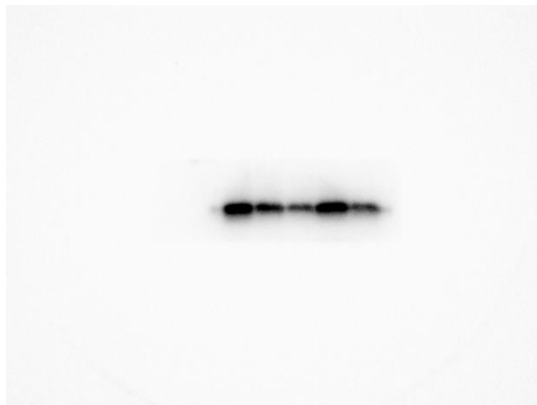

← FTH1

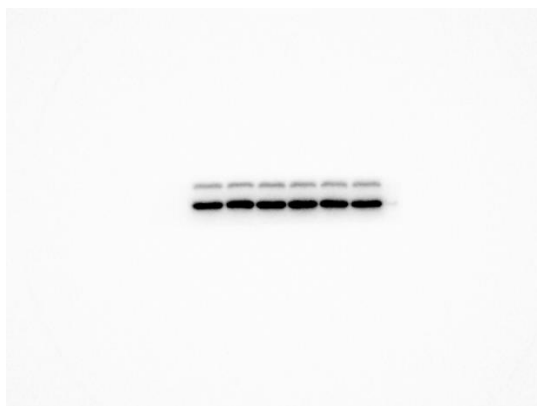

← Actin

WB original data for Figure 9A

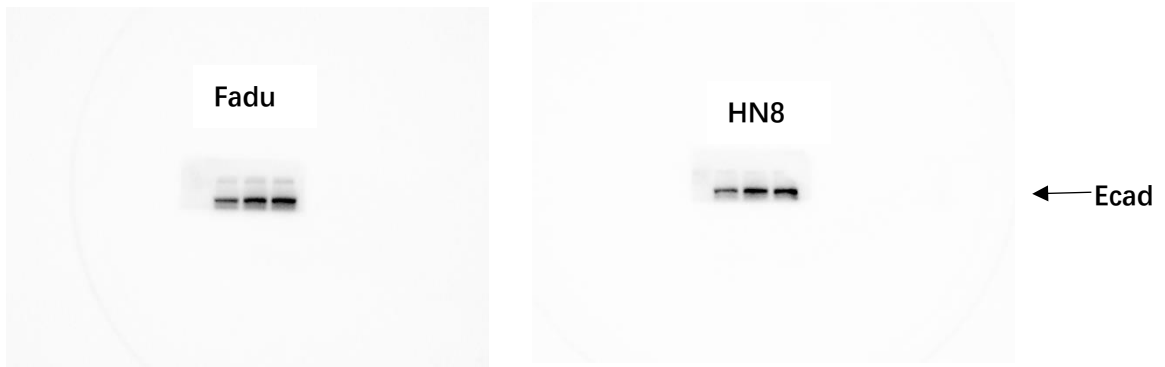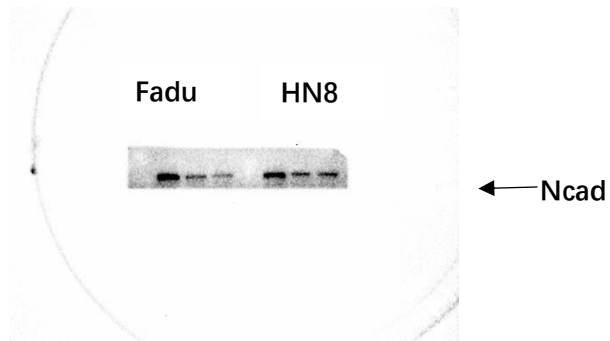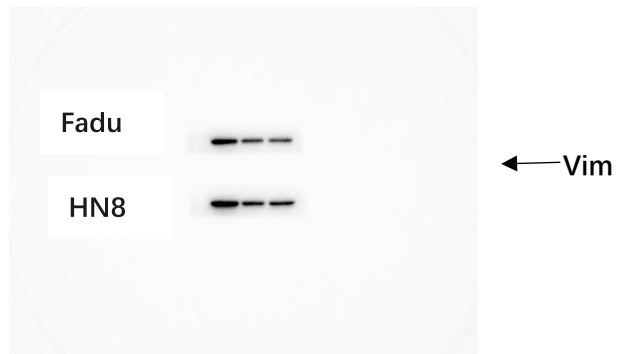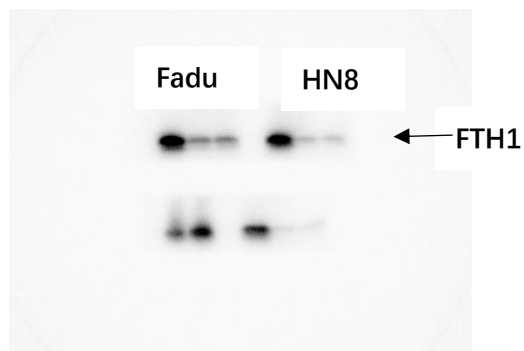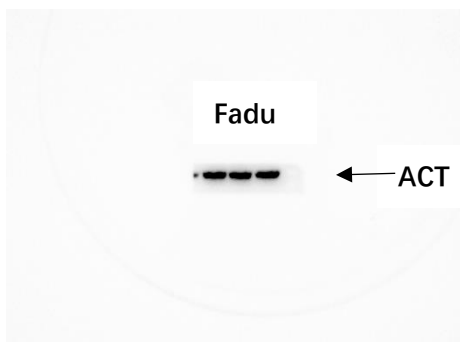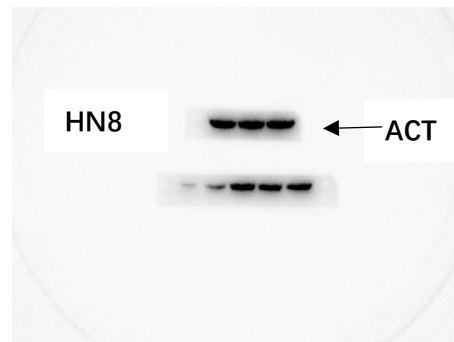

Supplement: GelsBlots.pdf [file GelsBlots.pdf]
